# Supplementary material for: Two-dimensional mass defect matrix plots for mapping genealogical links in mixtures of lignin depolymerisation products
Source: PubMed Central journal article supplement (PMC4914518; doi:10.1007/s00216-016-9598-5), 2016-05-14
Supplement: 216_2016_9598_MOESM1_ESM.pdf [file 216_2016_9598_MOESM1_ESM.pdf]

**Analytical and Bioanalytical Chemistry**

**Electronic Supplementary Material**

**Two-dimensional mass defect matrix plots for mapping genealogical links in mixtures of lignin depolymerisation products**

Yulin Qi, Rolf Hempelmann, Dietrich A. Volmer

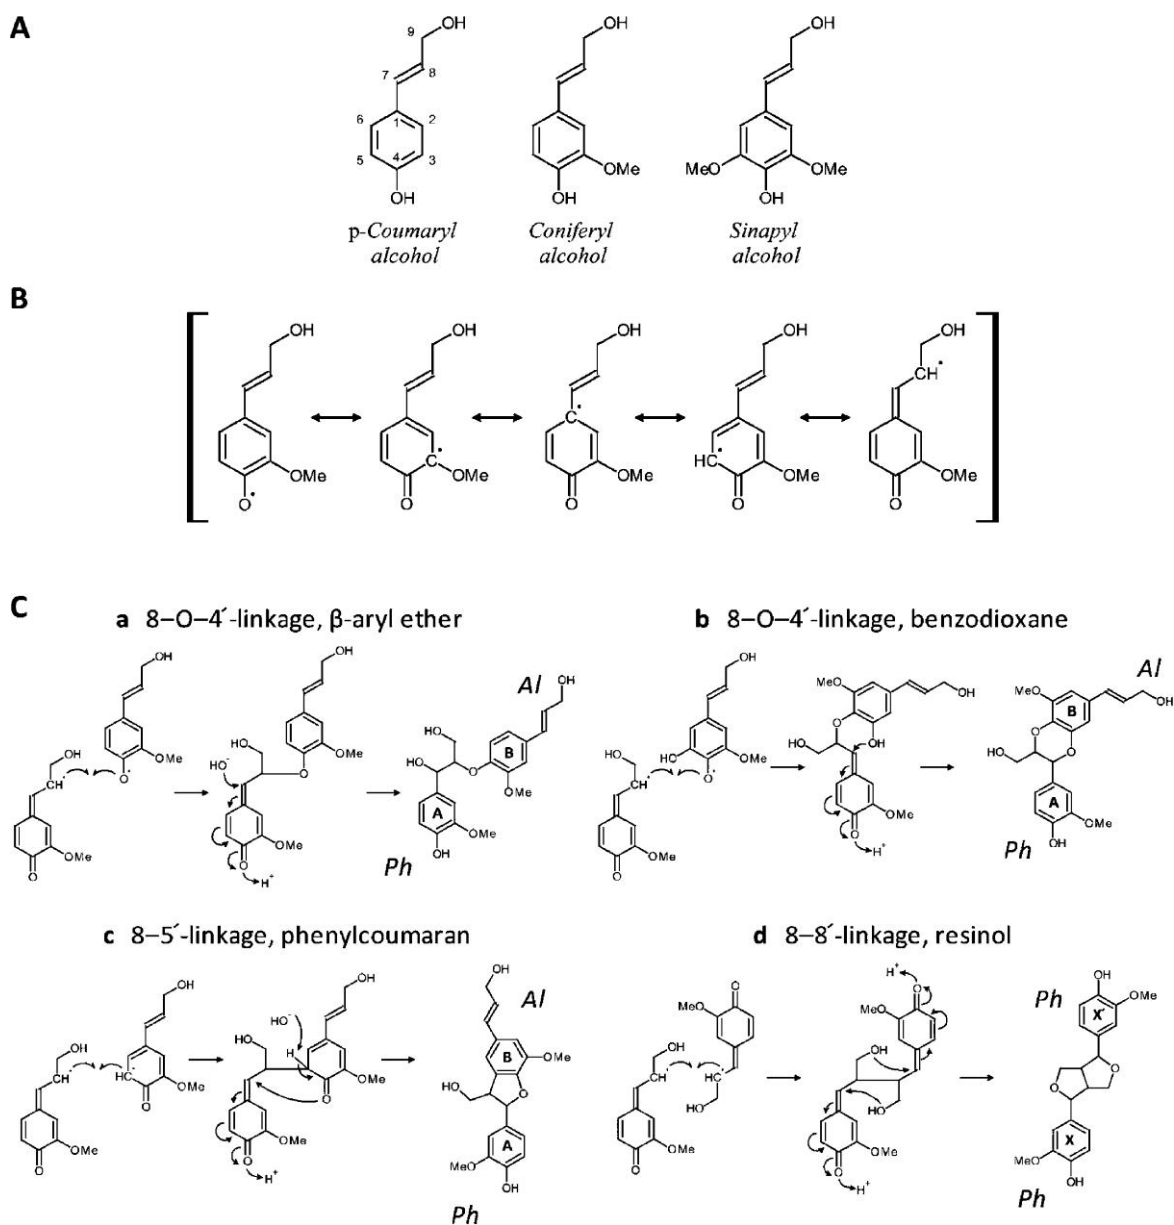

**Fig. S1** Radical-radical dimerisation of monolignols. (A) Monolignols. (B) Radical delocalisation following monolignol oxidation, illustrated for the coniferyl alcohol radical. (C) Main monolignol dimerisation reactions: *Ph*, phenolic end group; *Al*, aliphatic end group. For all compounds except the resinols, the phenolic and aliphatic end groups correspond to the A and B rings, respectively. Resinols contain two phenolic end groups corresponding to the X and X' rings. Reprinted with permission from Morreel K, Kim H, Lu F, et al (2010) Mass spectrometry-based fragmentation as an identification tool in lignomics. *Anal Chem* 82:8095–105

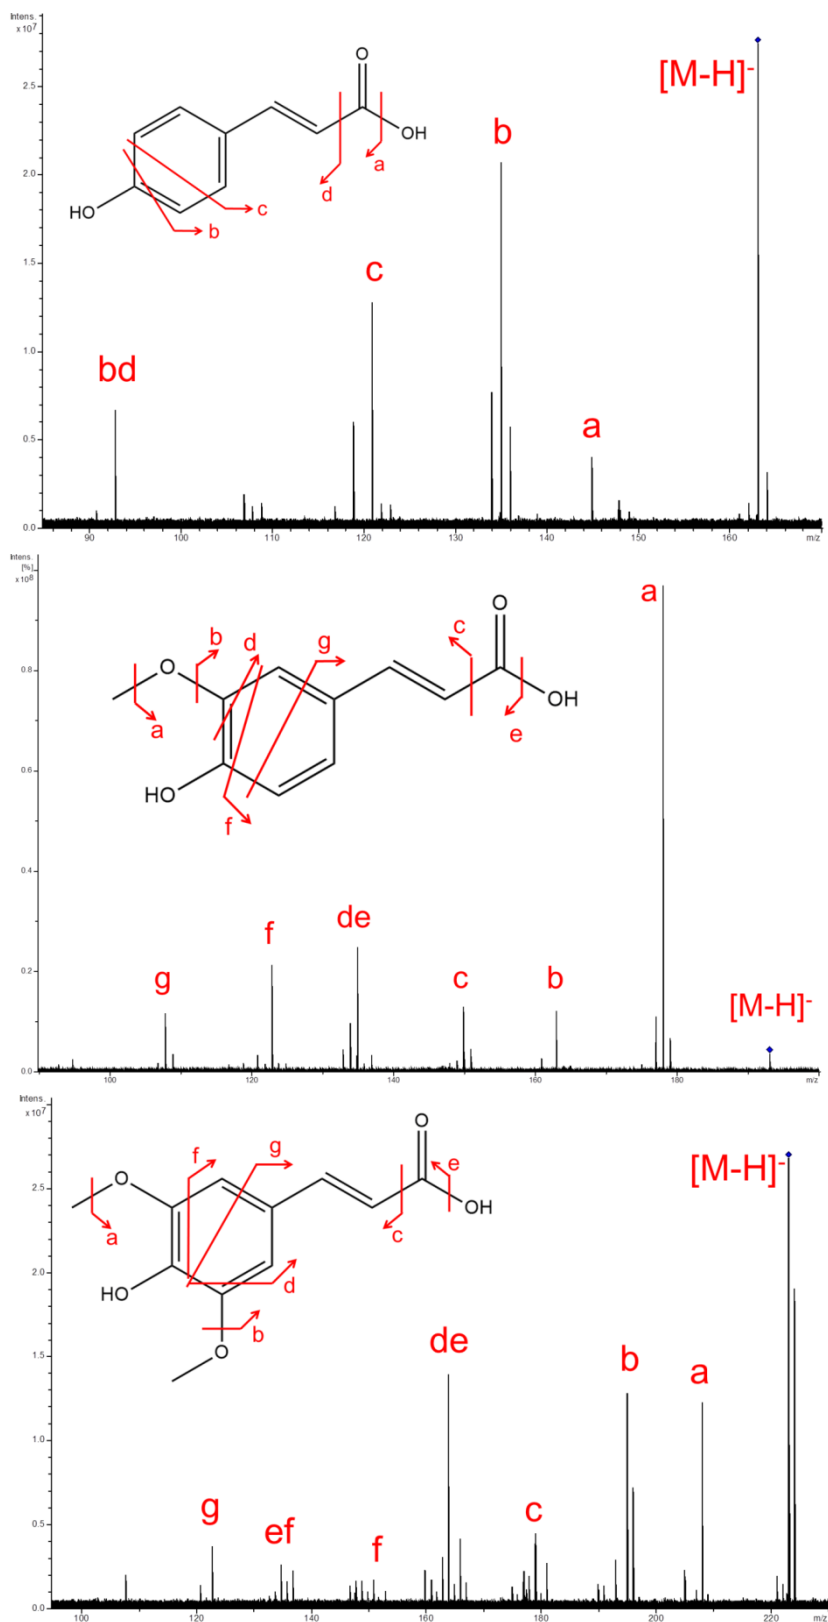

**Fig. S2** CID-MS/MS spectra for the deprotonated  $[M-H]^-$  ion of coumaryl (*top*), coniferyl (*middle*), and sinapyl acids (*bottom*), along with CID fragmentation schemes. The detailed peak assignments can be found in Table S2

**Table S1** Peak assignments for Figure 2 (bottom)

| No. | Compound                                                       | Calc. <i>m/z</i> | Exp. <i>m/z</i> | mDa error | ppm error |
|-----|----------------------------------------------------------------|------------------|-----------------|-----------|-----------|
| 1   | C <sub>15</sub> H <sub>16</sub> O <sub>10</sub>                | 355.06707        | 355.066919      | -0.15     | -0.43     |
| 2   | C <sub>19</sub> H <sub>16</sub> O <sub>7</sub>                 | 355.082326       | 355.08233       | 0.00      | 0.01      |
| 3   | C <sub>16</sub> H <sub>20</sub> O <sub>7</sub> S               | 355.085697       | 355.08572       | 0.02      | 0.06      |
| 4   | C <sub>16</sub> H <sub>20</sub> O <sub>9</sub>                 | 355.103456       | 355.10336       | -0.10     | -0.27     |
| 5   | C <sub>20</sub> H <sub>20</sub> O <sub>6</sub>                 | 355.118712       | 355.11868       | -0.03     | -0.09     |
| 6   | C <sub>23</sub> H <sub>19</sub> O <sub>3</sub> <sup>13</sup> C | 355.129498       | 355.12973       | 0.23      | 0.65      |
| 7   | C <sub>17</sub> H <sub>24</sub> O <sub>8</sub>                 | 355.139841       | 355.13984       | 0.00      | 0.00      |
| 8   | C <sub>21</sub> H <sub>24</sub> O <sub>5</sub>                 | 355.155097       | 355.15505       | -0.05     | -0.13     |
| 9   | C <sub>24</sub> H <sub>22</sub> NO <sub>2</sub>                | 355.157777       | 355.158027      | 0.25      | 0.70      |
| 10  | C <sub>18</sub> H <sub>28</sub> O <sub>7</sub>                 | 355.176227       | 355.17615       | -0.08     | -0.22     |
| 11  | C <sub>22</sub> H <sub>28</sub> O <sub>4</sub>                 | 355.191483       | 355.19148       | 0.00      | -0.01     |
| 12  | C <sub>19</sub> H <sub>32</sub> O <sub>4</sub> S               | 355.194854       | 355.19482       | -0.03     | -0.10     |
| 13  | C <sub>25</sub> H <sub>27</sub> O <sup>13</sup> C              | 355.202269       | 355.20271       | 0.44      | 1.24      |
| 14  | C <sub>19</sub> H <sub>32</sub> O <sub>6</sub>                 | 355.212612       | 355.21257       | -0.04     | -0.12     |
| 15  | C <sub>22</sub> H <sub>31</sub> O <sub>3</sub> <sup>13</sup> C | 355.223398       | 355.22371       | 0.31      | 0.88      |
| 16  | C <sub>23</sub> H <sub>32</sub> O <sub>3</sub>                 | 355.227868       | 355.22788       | 0.01      | 0.03      |
| 17  | C <sub>20</sub> H <sub>36</sub> O <sub>5</sub>                 | 355.248998       | 355.24902       | 0.02      | 0.06      |
| 18  | C <sub>23</sub> H <sub>35</sub> O <sub>2</sub> <sup>13</sup> C | 355.259784       | 355.26019       | 0.41      | 1.14      |
| 19  | C <sub>21</sub> H <sub>40</sub> O <sub>4</sub>                 | 355.285383       | 355.28544       | 0.06      | 0.16      |

**Table S2** CID fragments of coumaryl, coniferyl, and sinapyl acid

| <b>coumaryl alcohol</b>  |                                                |                         |                        |                  |
|--------------------------|------------------------------------------------|-------------------------|------------------------|------------------|
| <b>Fragment cleavage</b> | <b>Proposed formula</b>                        | <b>Calc. <i>m/z</i></b> | <b>Exp. <i>m/z</i></b> | <b>ppm error</b> |
| [M-H] <sup>-</sup>       | C <sub>9</sub> H <sub>7</sub> O <sub>3</sub>   | 163.04007               | 163.04040              | 2.04             |
| a                        | C <sub>9</sub> H <sub>5</sub> O <sub>2</sub>   | 145.02841               | 145.02841              | 0.00             |
| b                        | C <sub>8</sub> H <sub>7</sub> O <sub>2</sub>   | 135.04406               | 135.04400              | -0.41            |
| c                        | C <sub>7</sub> H <sub>5</sub> O <sub>2</sub>   | 121.02841               | 121.02830              | -0.88            |
| bd                       | C <sub>6</sub> H <sub>5</sub> O                | 93.03349                | 93.03360               | 1.17             |
| <b>coniferyl alcohol</b> |                                                |                         |                        |                  |
| <b>Fragment cleavage</b> | <b>Proposed formula</b>                        | <b>Calc. <i>m/z</i></b> | <b>Exp. <i>m/z</i></b> | <b>ppm error</b> |
| [M-H] <sup>-</sup>       | C <sub>10</sub> H <sub>9</sub> O <sub>4</sub>  | 193.05063               | 193.05050              | -0.68            |
| a                        | C <sub>9</sub> H <sub>6</sub> O <sub>4</sub>   | 178.02606               | 178.02600              | -0.34            |
| b                        | C <sub>9</sub> H <sub>7</sub> O <sub>3</sub>   | 163.03897               | 163.03890              | -0.44            |
| c                        | C <sub>8</sub> H <sub>6</sub> O <sub>3</sub>   | 150.03115               | 150.03100              | -0.97            |
| de                       | C <sub>8</sub> H <sub>7</sub> O <sub>2</sub>   | 135.04406               | 135.04400              | -0.41            |
| f                        | C <sub>7</sub> H <sub>7</sub> O <sub>2</sub>   | 123.04406               | 123.04400              | -0.46            |
| g                        | C <sub>6</sub> H <sub>4</sub> O <sub>2</sub>   | 108.02058               | 108.02050              | -0.75            |
| <b>sinapyl alcohol</b>   |                                                |                         |                        |                  |
| <b>Fragment cleavage</b> | <b>Proposed formula</b>                        | <b>Calc. <i>m/z</i></b> | <b>Exp. <i>m/z</i></b> | <b>ppm error</b> |
| [M-H] <sup>-</sup>       | C <sub>11</sub> H <sub>11</sub> O <sub>5</sub> | 223.06120               | 223.06110              | -0.43            |
| a                        | C <sub>10</sub> H <sub>8</sub> O <sub>5</sub>  | 208.03663               | 208.03670              | 0.36             |
| b                        | C <sub>10</sub> H <sub>11</sub> O <sub>4</sub> | 195.06519               | 195.06510              | -0.44            |
| c                        | C <sub>10</sub> H <sub>7</sub> O <sub>3</sub>  | 175.03897               | 175.03890              | -0.41            |
| de                       | C <sub>9</sub> H <sub>8</sub> O <sub>3</sub>   | 164.04680               | 164.04670              | -0.59            |
| f                        | C <sub>8</sub> H <sub>7</sub> O <sub>3</sub>   | 151.03897               | 151.03890              | -0.47            |
| ef                       | C <sub>8</sub> H <sub>7</sub> O <sub>2</sub>   | 135.04406               | 135.04400              | -0.41            |
| g                        | C <sub>7</sub> H <sub>7</sub> O <sub>2</sub>   | 123.04406               | 123.04400              | -0.46            |

**Table S3** CID fragments of compound C<sub>27</sub>H<sub>28</sub>O<sub>9</sub> (Figure 5)

| <b>Fragment cleavage</b> | <b>Proposed formula</b>                        | <b>Calc. <i>m/z</i></b> | <b>Exp. <i>m/z</i></b> | <b>ppm error</b> |
|--------------------------|------------------------------------------------|-------------------------|------------------------|------------------|
| <b>[M-H]-</b>            | C <sub>27</sub> H <sub>27</sub> O <sub>9</sub> | 495.16606               | 495.16600              | -0.11            |
| <b>a</b>                 | C <sub>27</sub> H <sub>25</sub> O <sub>8</sub> | 477.15439               | 477.15460              | 0.43             |
| <b>ab</b>                | C <sub>27</sub> H <sub>23</sub> O <sub>7</sub> | 459.14383               | 459.14370              | -0.28            |
| <b>c</b>                 | C <sub>26</sub> H <sub>25</sub> O <sub>7</sub> | 449.15948               | 449.15960              | 0.27             |
| <b>d</b>                 | C <sub>20</sub> H <sub>21</sub> O <sub>7</sub> | 373.12818               | 373.12810              | -0.21            |
| <b>e</b>                 | C <sub>18</sub> H <sub>17</sub> O <sub>7</sub> | 345.09688               | 345.09680              | -0.23            |
| <b>e-H<sub>2</sub>O</b>  | C <sub>18</sub> H <sub>17</sub> O <sub>6</sub> | 329.10197               | 329.10190              | -0.20            |
| <b>f</b>                 | C <sub>18</sub> H <sub>19</sub> O <sub>5</sub> | 315.12270               | 315.12280              | 0.32             |
| <b>g</b>                 | C <sub>18</sub> H <sub>19</sub> O <sub>4</sub> | 299.12779               | 299.12780              | 0.05             |
| <b>h</b>                 | C <sub>15</sub> H <sub>13</sub> O <sub>5</sub> | 273.07575               | 273.07570              | -0.18            |
| <b>i</b>                 | C <sub>9</sub> H <sub>9</sub> O <sub>4</sub>   | 181.04954               | 181.04960              | 0.36             |
| <b>j</b>                 | C <sub>9</sub> H <sub>9</sub> O <sub>2</sub>   | 149.05971               | 149.05980              | 0.63             |

**Table S4** Chemical formulae and peak areas for the compounds plotted in Figure 6

| blue dots ●       |           |                                                                                      |
|-------------------|-----------|--------------------------------------------------------------------------------------|
| Compound formula  | Peak area | Proposed structures                                                                  |
| $C_{15}H_{12}O_2$ | 3422      | 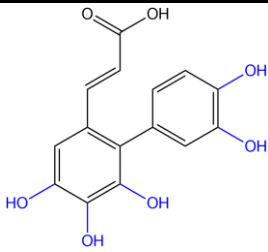   |
| $C_{15}H_{12}O_3$ | 23039     |                                                                                      |
| $C_{15}H_{12}O_4$ | 35326     |                                                                                      |
| $C_{15}H_{12}O_5$ | 110062    |                                                                                      |
| $C_{15}H_{12}O_6$ | 47377     |                                                                                      |
| $C_{15}H_{12}O_7$ | 5019      |                                                                                      |
| red dots ●        |           |                                                                                      |
| Compound formula  | Peak area | Proposed structures                                                                  |
| $C_{15}H_{12}O_2$ | 3422      |   |
| $C_{16}H_{14}O_3$ | 21978     |                                                                                      |
| $C_{17}H_{16}O_4$ | 37415     |                                                                                      |
| $C_{18}H_{18}O_5$ | 177968    |                                                                                      |
| $C_{19}H_{20}O_6$ | 662431    |                                                                                      |
| $C_{20}H_{22}O_7$ | 1222609   |                                                                                      |
| blue triangles ▲  |           |                                                                                      |
| Compound formula  | Peak area | Proposed structures                                                                  |
| $C_{13}H_{10}O_2$ | 3010      |  |
| $C_{13}H_{10}O_3$ | 18431     |                                                                                      |
| $C_{13}H_{10}O_4$ | 29498     |                                                                                      |
| $C_{13}H_{10}O_5$ | 20760     |                                                                                      |
| $C_{13}H_{10}O_6$ | 1777      |                                                                                      |
| $C_{13}H_{10}O_7$ | 1716      |                                                                                      |
| red triangles ▲   |           |                                                                                      |
| Compound formula  | Peak area | Proposed structures                                                                  |
| $C_{13}H_{10}O_2$ | 3010      |  |
| $C_{14}H_{12}O_3$ | 32076     |                                                                                      |
| $C_{15}H_{14}O_4$ | 269771    |                                                                                      |
| $C_{16}H_{16}O_5$ | 313164    |                                                                                      |
| $C_{17}H_{18}O_6$ | 317250    |                                                                                      |
| $C_{18}H_{20}O_7$ | 212027    |                                                                                      |
